# Supplementary material for: Refining remote sensing precipitation datasets in the South Pacific with an adaptive multi-method calibration approach
Source: Copernicus journal article supplement (doi:10.5194/hess-29-799-2025), 2025-02-13
Supplement: Supplementary file 2 [file hess-29-799-2025-supplement.zip]

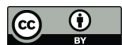

## *Supplement of*

# **Refining remote sensing precipitation datasets in the South Pacific with an adaptive multi-method calibration approach**

Óscar Mirones et al.

*Correspondence to:* Joaquín Bedia (bediaj@unican.es)

- hess-29-799-2025-supplement-title-page.pdf
- 2023\_adaptiveCalibration
  - .Rhistory
  - 2023\_adaptiveCalibration.Rmd
  - 2023\_adaptiveCalibration.html
  - 2023\_adaptiveCalibration.pdf
  - utils
    - \* MaxReturnValue.R
    - \* RFscore.R
    - \* adaptiveCalibration.R

The copyright of individual parts of the supplement might differ from the article licence.
